# Supplementary material
Source: PubMed Central journal article supplement (PMC8671355)
Supplement: NIHMS1756150-supplement-9.pdf [file NIHMS1756150-supplement-9.pdf]

**HELLO DNA sequence:**

ACCATGCGATCTTTGTTGATCCTGGTTTTGTGTTTTTTGCCCTGGCTGCTCTCGGGAAAGTATTCGGCC  
GGTGCAGCTGGCTGCTGCTATGAAGCGACATGGGTTGGACAATTATAGAGGCTATAGCCTCGGAAACTG  
GGTGTGCGCCGAAAATTCGAGAGTAATTTCAATACCCAGGCTACAAATAGAAATACAGATGGTTCACA  
GACTATGGTATTCTCCAGATCAATAGCAGGTGGTGGTGTAAACGACGGCCGAACACCCGGTTCTCGCAACC  
TCTGTAACATAACCATGTTTCAGCCCTTCTCTCTAGCGATATAACTGCATCCGTTAATTCGCGCAAAGAAAAT  
AGTCAGTGATGGGAATGGAATGAACGCTTGGGTGCGATGGAGGAACCGATGCAAGGGTACTGACGTGCAG  
GCTTGGATTTCGAGGCTGTAGGCTGGTGGAGGCGGTTTCAGGCGGAGGTGGCTCTGGCGGTGGCGGATCGA  
AAGCTGTGTACAACCTTTGCAACATGCGGGATCGACTACAAGGATGACGATGACAAGGGTTTGAACGGCCC  
TGACATTTACAAGGGAGTTTATCAGTTTAAATCCGTTGAGTTTGACTACCCATACGATGTTCCAGATTAC  
GCTGGATCTGGAGAGGGCAGAGGAAGTCTGCTAACATGCGGTGACGTCGAGGAGAATCCTGGCCCAATGG  
TCAGCAAGGGCGAGGCAGTGATCAAGGAGTTCATGCGGTTCAAGGTGCACATGGAGGGCTCCATGAACGG  
CCACGAGTTCGAGATCGAGGGCGAGGGCGAGGGCCGCCCTACGAGGGCACCCAGACCGCCAAGCTGAAG  
GTGACCAAGGGTGGCCCCCTGCCCTTCTCCTGGGACATCCTGTCCCCTCAGTTCATGTACGGCTCCAGGG  
CCTTCATCAAGCACCCCGCCGACATCCCCGACTACTATAAGCAGTCCCTCCCCGAGGGCTTCAAGTGGGA  
GCGCGTGATGAACTTCGAGGACGGCGGCGCCGTGACCGTGACCCAGGACACCTCCCTGGAGGACGGCACC  
CTGATCTACAAGGTCAAGCTCCGCGGCACCAACTTCCCTCCTGACGGCCCCGTAATGCAGAAGAAGACAA  
TGGGCTGGGAAGCGTCCACCGAGCGGTTGTACCCCGAGGACGGCGTGCTGAAGGGCGACATTAAGATGGC  
CCTGCGCCTGAAGGACGGCGGCCGCTACCTGGCGGACTTCAAGACCACCTACAAGGCCAAGAAGCCCGTG  
CAGATGCCCGGCGCCTACAACGTGACCGCAAGTTGGACATCACCTCCCACAACGAGGACTACACCGTGG  
TGAACAGTACGAACGCTCCGAGGGCCGCCACTCCACCGGCGGCATGGACGAGCTGTACAAGTGA

**HELLO:**

[Signal Peptide]HEL-LINKER-GP33-43/FLAG/GP61-80-HA-T2A-mScarlet

MRSLLILVLCFLPLAALGKVFGRCELAAMKRHGLDNYRGYSLGNWVCAAKFESNFNTQATNRNTDGSTD  
YGILQINSRWWCNDGRTPGSRNLCNIPCSALLSSDITASVNC AKKIVSDGNMNAWVAWRNRCKGTDVQA  
WIRGRLGGGSGGGSGGGGSKAVYNFATCGIDYKDDDDKGLNGPDIYKGVYQFKSVEFDYYPYDVPDYA  
GSSEGRSLLTCGDVEENPGPMVSKGEAVIKEFMRFKVHMEGSMNGHEFEIEGEGEGRPYEGTQTAKLKV  
TKGGPLPFSWDILSPQFMYGSRAFIKHPADIPDYKQSFPEGFKWERVMNFEDGGAVTVTQDTSLEDGTL  
IYKVKLRGTNFPDPGPMQKKTMGWEASTERLYPEDGVLKGDIKMALRLKDGGRYLADFKTTYKAKKPVQ  
MPGAYNVDRKLDITSHNEDYTVVEQYERSEGRHSTGGMDELYK

**NINJA:**

N-GFP-LINKER-GP33-43/FLAG/GP61-80-LINKER-C-GFP

MVSKGEELFTGVVPILEVELDGDVNGHKFSVSGEGEGDATYGKLT LKFICTTGKLPVPWPTLVTTLYGVQ  
CFSRYPDHMKQHDFFKSAMPEGYVQERTIFFKDDGNYKTRAEVKFEGDTLVNRIELKGI DFKEDGNILGH  
KLEYNYN SHNVYIMARCKIPNDLKQKVMNHKAVYNFATCGIDYKDDDDKGLNGPDIYKGVYQFKSVEFDA  
AADLSICRRSADKQKNGIKVNFKIRHNI EDGSVQLADHYQQNTPIGDGPVLLPDNHYLSTQSALS KDPNE  
KRDHMLLEFVTAAGITLGMDELYK
