# Supplementary material
Source: PubMed Central journal article supplement (PMC8671355)
Supplement: NIHMS1756150-supplement-10.pdf [file NIHMS1756150-supplement-10.pdf]

## HELLO

| pos | HLA    | peptide     | Core      | Offset | I_pos | I_len | D_pos | D_len | iCore | Identity  | 1-log50k(aff) | Affinity(nM) | %Rank  | BindLevel  |
|-----|--------|-------------|-----------|--------|-------|-------|-------|-------|-------|-----------|---------------|--------------|--------|------------|
| 40  | H-2-Db | YSLGNWVCA   | YSLGNWVCA | 0      | 0     | 0     | 0     | 0     | 0     | YSLGNWVCA | Sequence      | 0.605        | 71.57  | 0.05 <= SB |
| 163 | H-2-Kb | AVYNFATC    | AVYN-FATC | 0      | 4     | 1     | 0     | 0     | 0     | AVYNFATC  | Sequence      | 0.686        | 29.94  | 0.09 <= SB |
| 296 | H-2-Db | FMYGSRAFI   | FMYGSRAFI | 0      | 0     | 0     | 0     | 0     | 0     | FMYGSRAFI | Sequence      | 0.489        | 251.8  | 0.12 <= SB |
| 162 | H-2-Db | KAVYNFATCGI | KAVYNFATI | 0      | 0     | 0     | 8     | 2     | 2     | KAVYNFATI | Sequence      | 0.454        | 365.87 | 0.17 <= SB |
| 6   | H-2-Kb | LVLCLPL     | LVLC-FLPL | 0      | 4     | 1     | 0     | 0     | 0     | LVLCLPL   | Sequence      | 0.621        | 60.39  | 0.17 <= SB |
| 190 | H-2-Kb | GVYQFKSV    | GVYQ-FKSV | 0      | 4     | 1     | 0     | 0     | 0     | GVYQFKSV  | Sequence      | 0.536        | 152.11 | 0.4 <= SB  |
| 238 | H-2-Kb | VIKEFMRF    | VIKE-FMRF | 0      | 4     | 1     | 0     | 0     | 0     | VIKEFMRF  | Sequence      | 0.475        | 294.53 | 0.7 <= WB  |
| 138 | H-2-Kb | QAWIRGCRL   | QAWIRGCRL | 0      | 0     | 0     | 0     | 0     | 0     | QAWIRGCRL | Sequence      | 0.452        | 376.98 | 0.9 <= WB  |
| 93  | H-2-Kb | CNIPCSALL   | CNIPCSALL | 0      | 0     | 0     | 0     | 0     | 0     | CNIPCSALL | Sequence      | 0.431        | 470.98 | 1 <= WB    |

## NINJA

| pos | HLA    | peptide     | Core      | Offset | I_pos | I_len | D_pos | D_len | iCore | Identity    | 1-log50k(aff) | Affinity(nM) | %Rank  | BindLevel  |
|-----|--------|-------------|-----------|--------|-------|-------|-------|-------|-------|-------------|---------------|--------------|--------|------------|
| 171 | H-2-Kb | AVYNFATC    | AVYN-FATC | 0      | 4     | 1     | 0     | 0     | 0     | AVYNFATC    | Sequence      | 0.686        | 29.94  | 0.09 <= SB |
| 170 | H-2-Db | KAVYNFATCGI | KAVYNFATI | 0      | 0     | 0     | 8     | 2     | 2     | KAVYNFATCGI | Sequence      | 0.454        | 365.87 | 0.17 <= SB |
| 198 | H-2-Kb | GVYQFKSV    | GVYQ-FKSV | 0      | 4     | 1     | 0     | 0     | 0     | GVYQFKSV    | Sequence      | 0.536        | 152.11 | 0.4 <= SB  |
