# Supplementary material
Source: PubMed Central journal article supplement (PMC8671355)

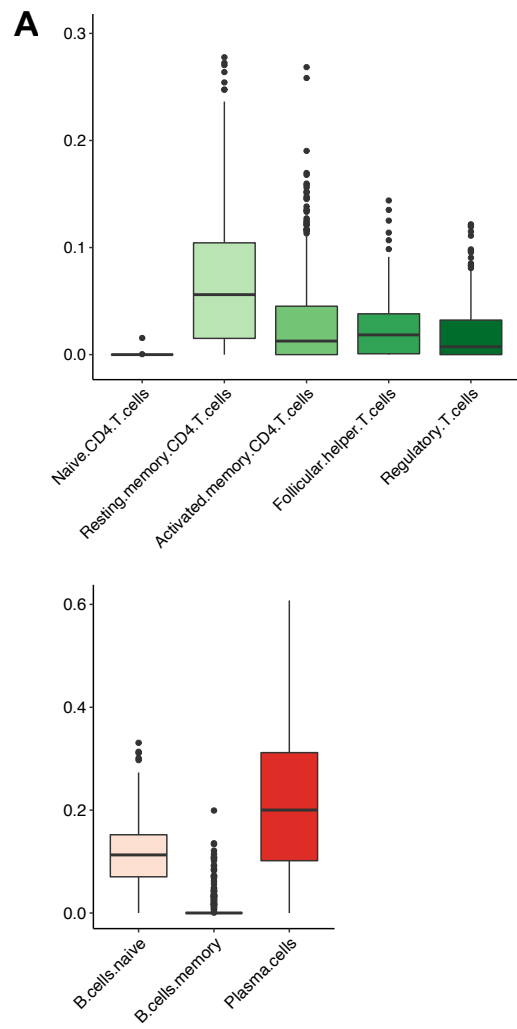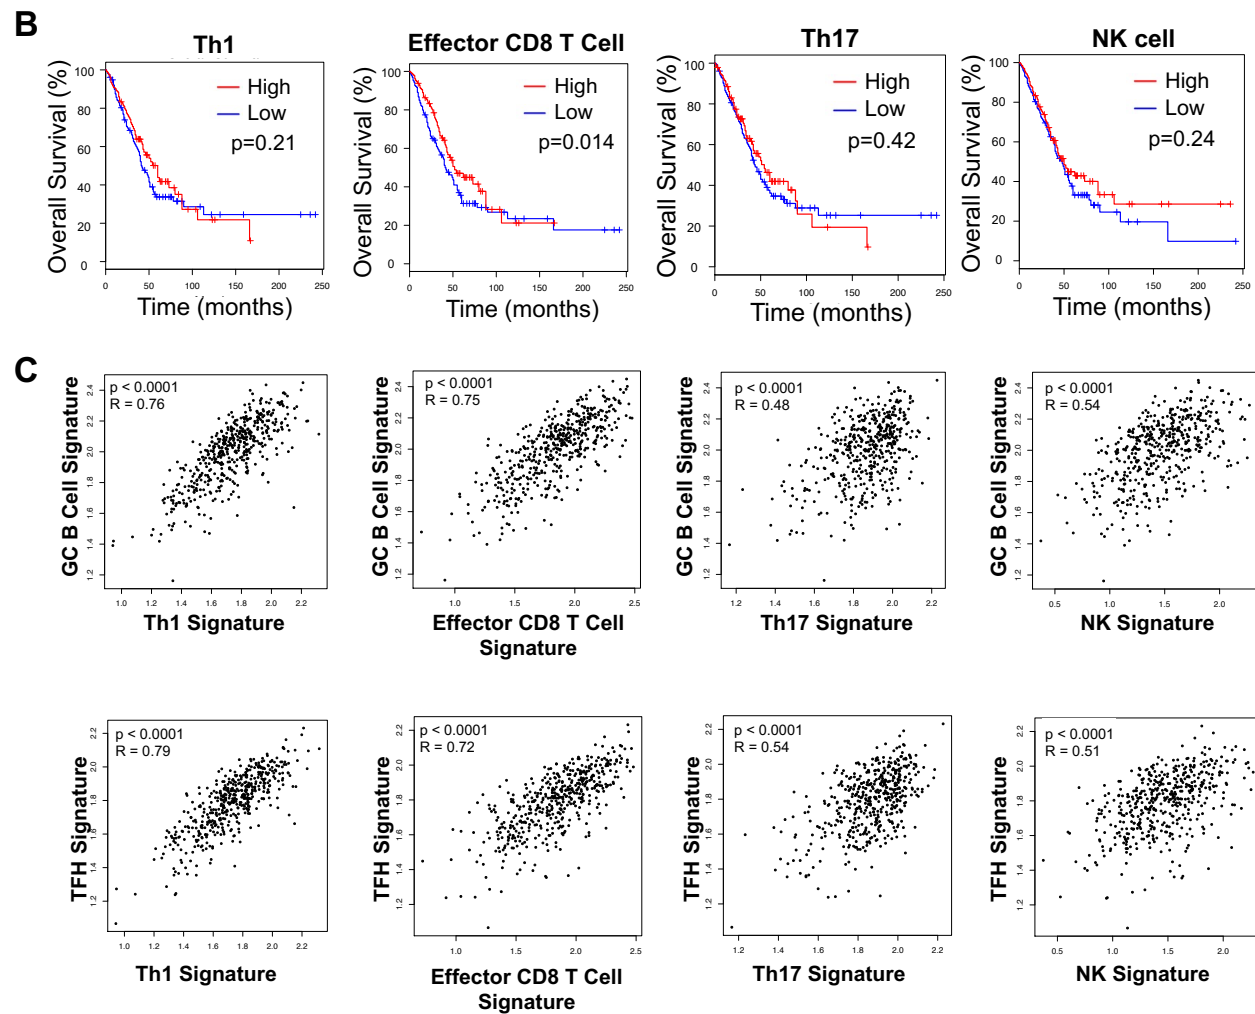

**Figure S1**  
*Cui et. al.*

Supplement: NIHMS1756150-supplement-1.pdf [file NIHMS1756150-supplement-1.pdf]

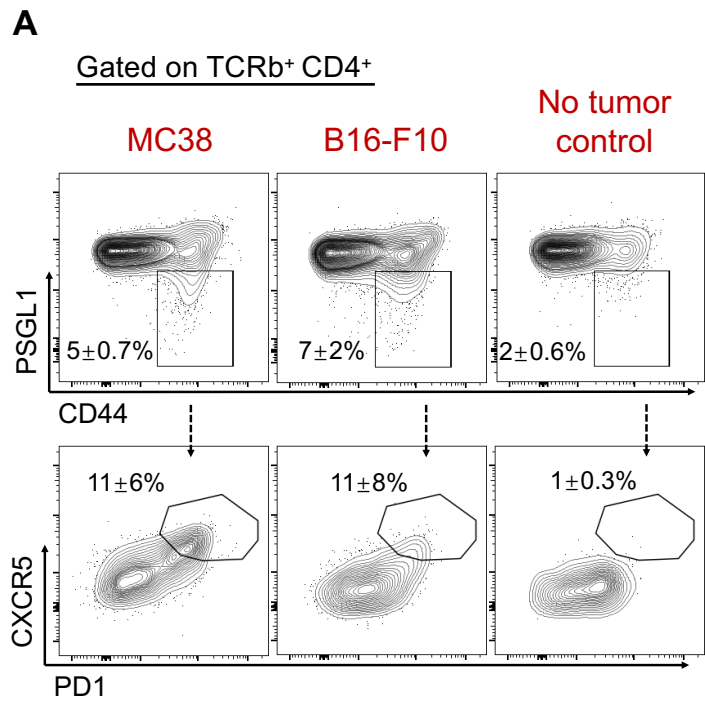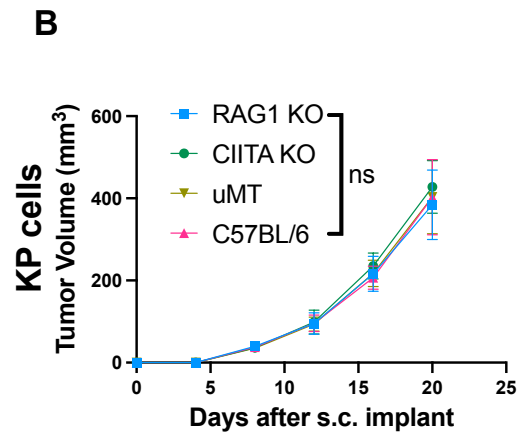

**Figure S2**  
*Cui et. al.*

Supplement: NIHMS1756150-supplement-2.pdf [file NIHMS1756150-supplement-2.pdf]

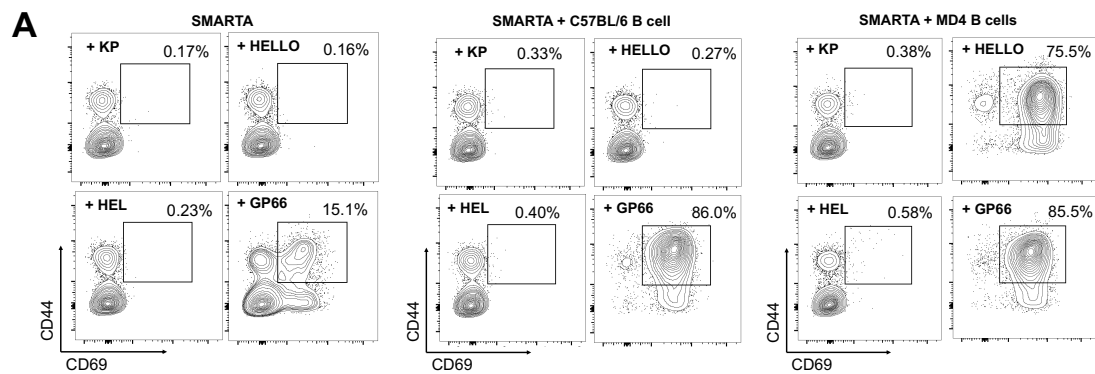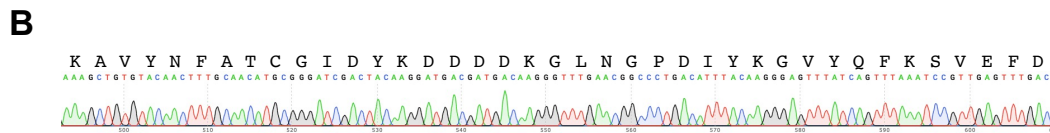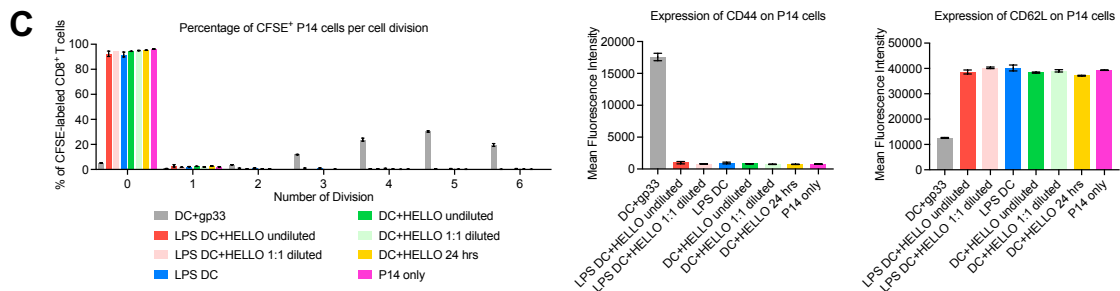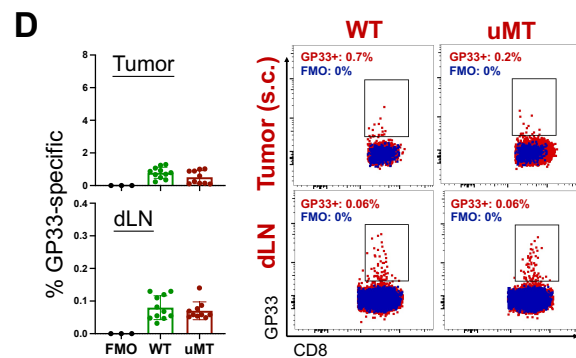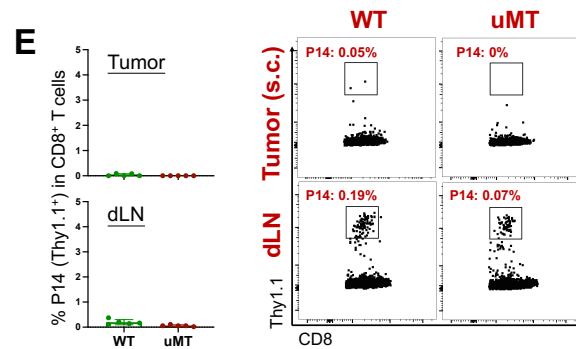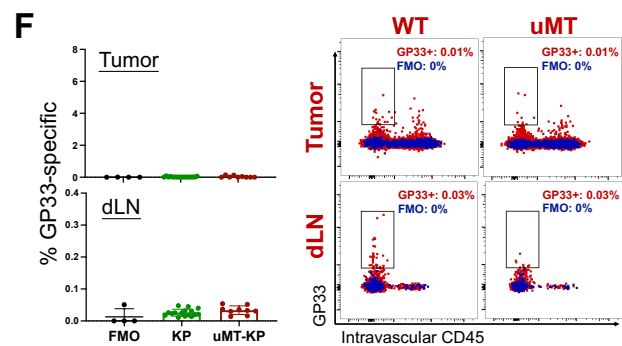

**Figure S3**  
Cui et. al.

Supplement: NIHMS1756150-supplement-3.pdf [file NIHMS1756150-supplement-3.pdf]

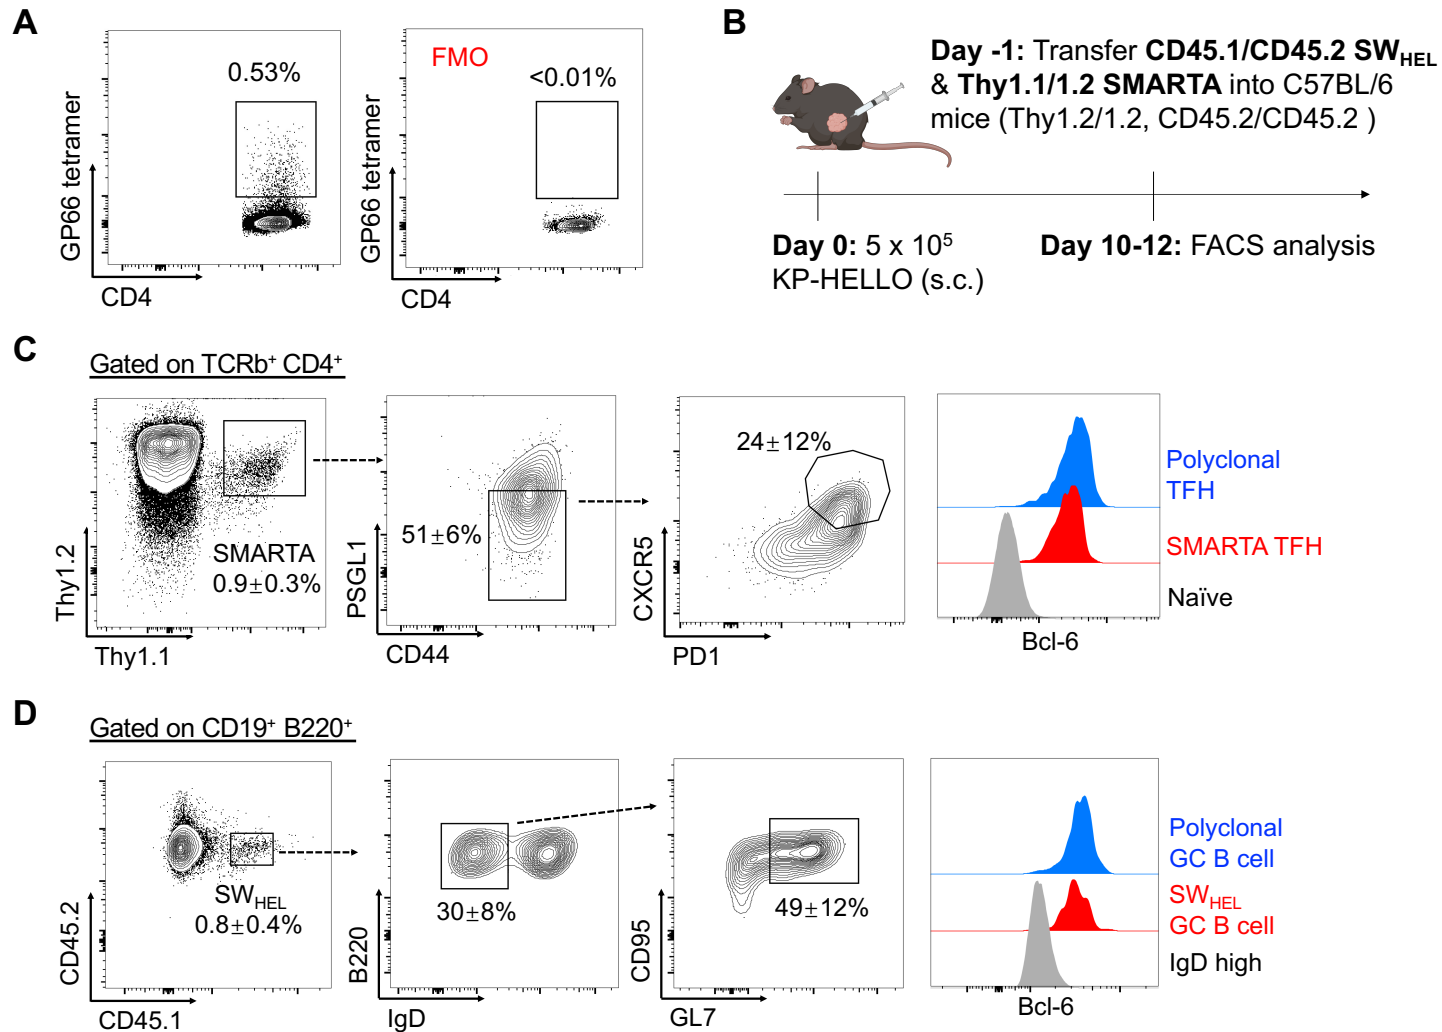

**Figure S4**  
*Cui et. al.*

Supplement: NIHMS1756150-supplement-4.pdf [file NIHMS1756150-supplement-4.pdf]

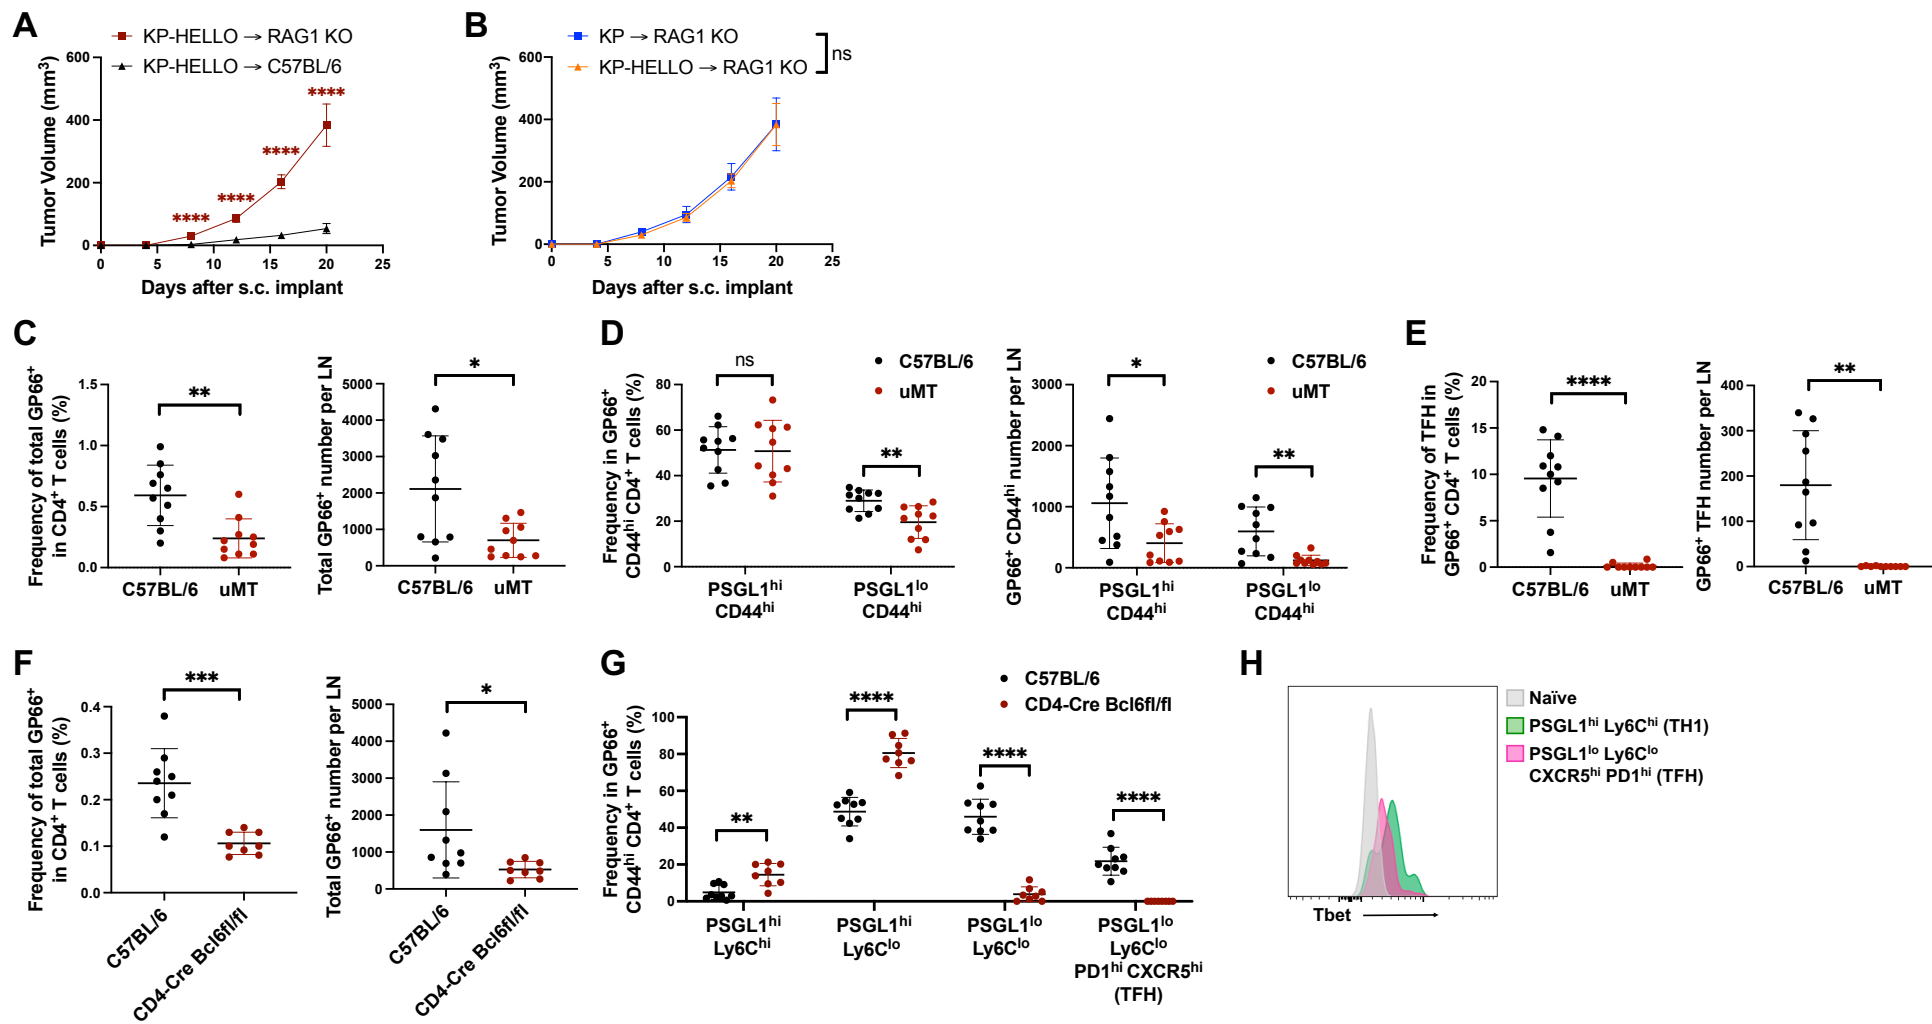

**Figure S5**  
*Cui et. al.*

Supplement: NIHMS1756150-supplement-5.pdf [file NIHMS1756150-supplement-5.pdf]

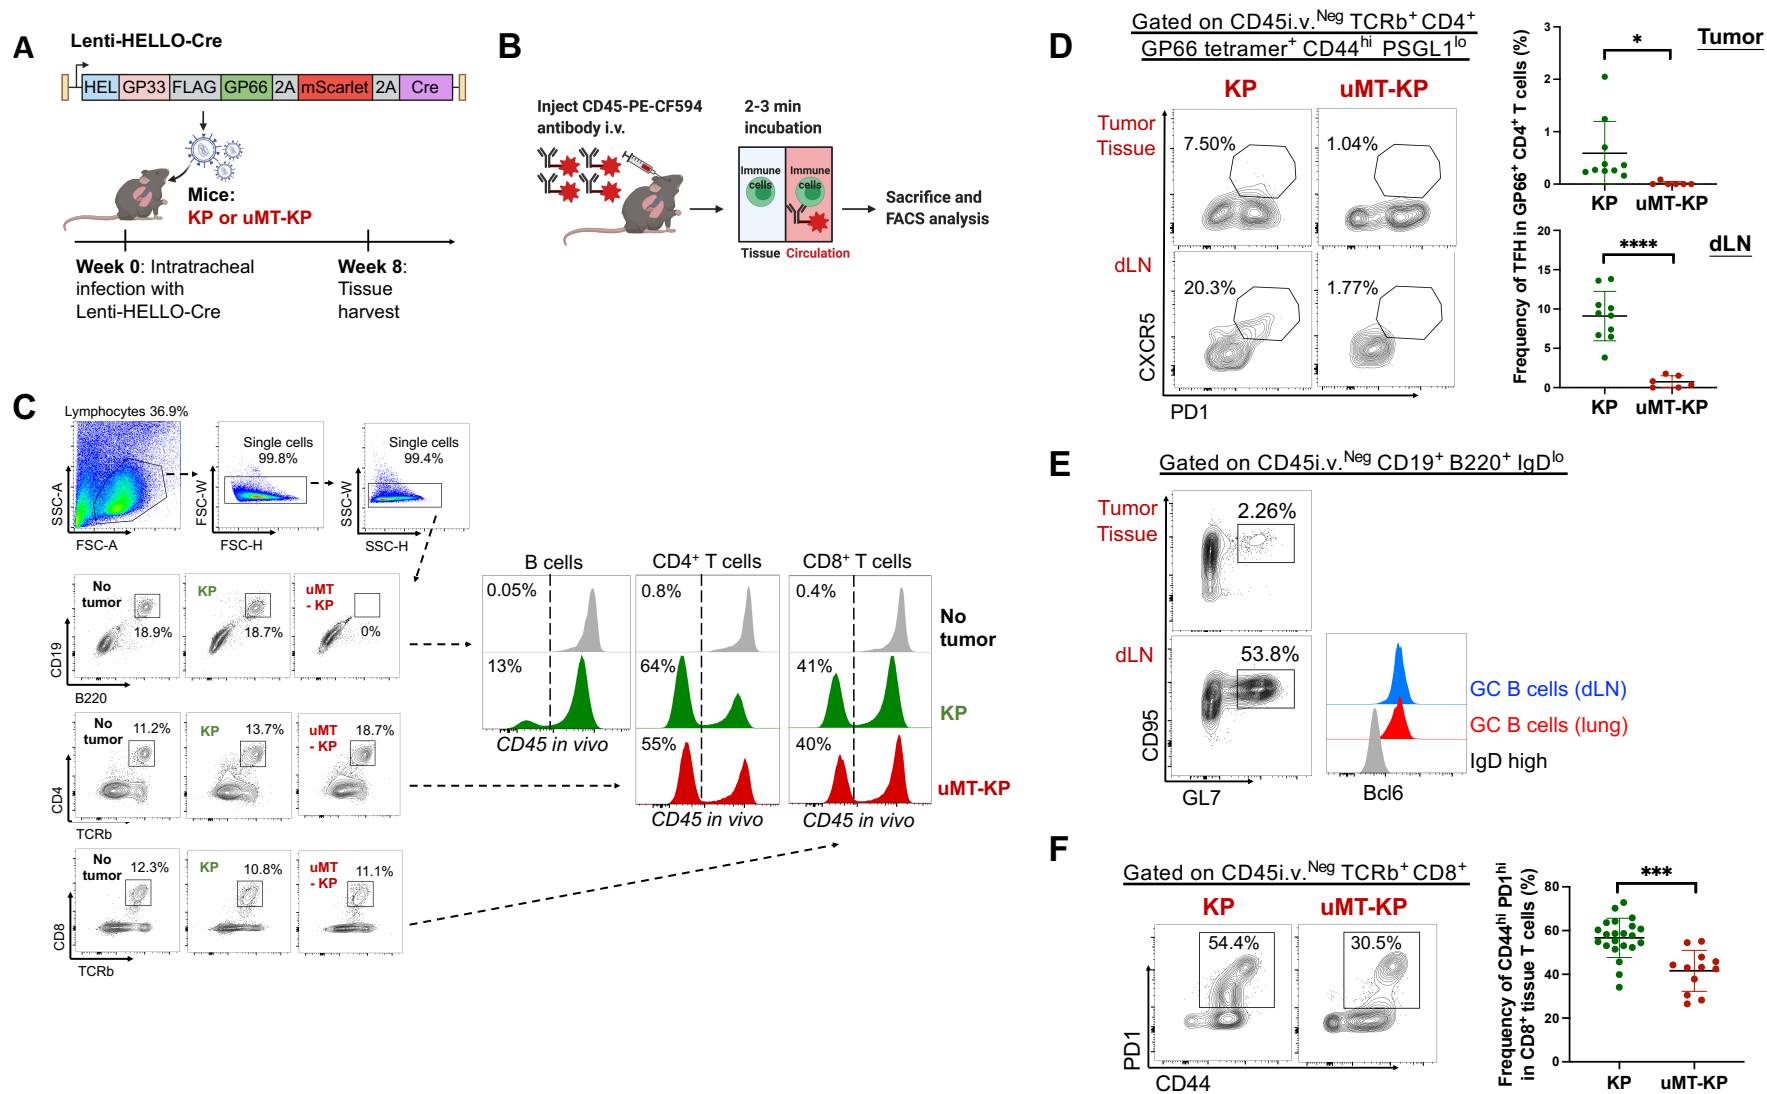

**Figure S6**  
*Cui et. al.*

Supplement: NIHMS1756150-supplement-6.pdf [file NIHMS1756150-supplement-6.pdf]

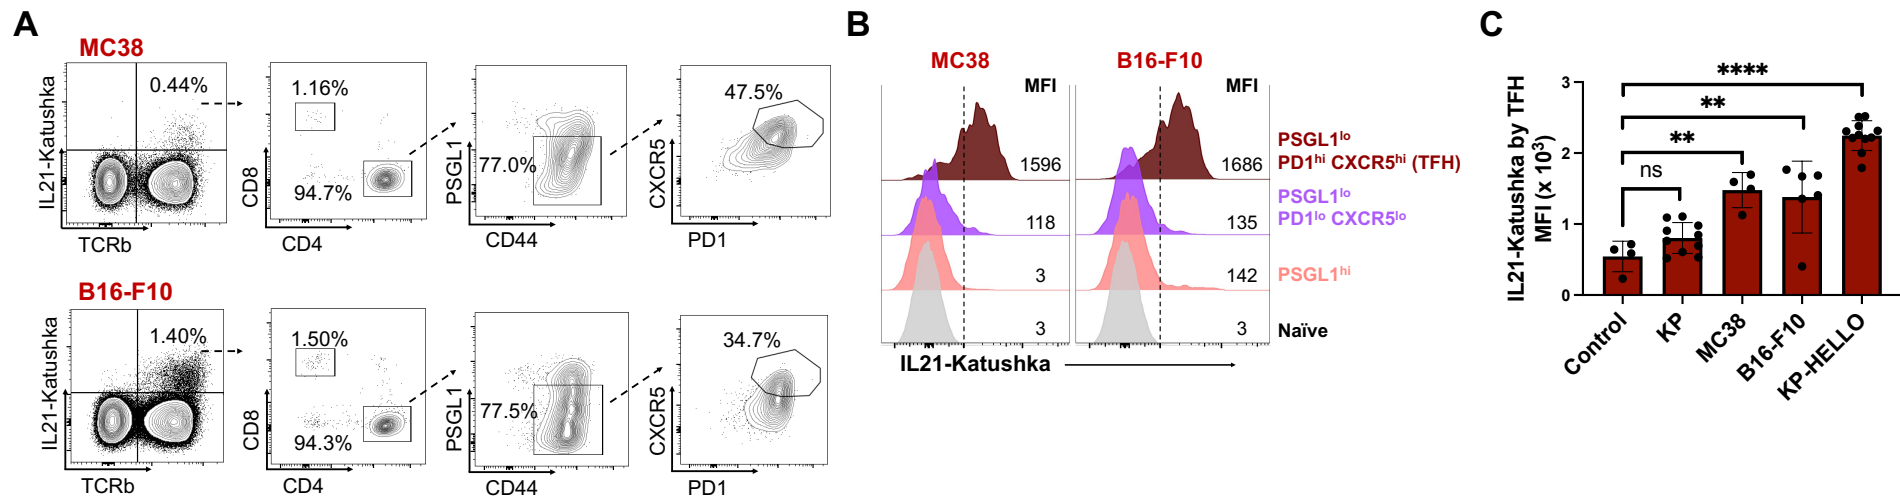

**Figure S7**  
Cui et. al.

Supplement: NIHMS1756150-supplement-7.pdf [file NIHMS1756150-supplement-7.pdf]
